# Supplementary material
Source: publisher site journal article supplement (https://www.dovepress.com/article/520775)
Supplement: Supplementary file 1 [file 520775%20Revised%20Supplementary%201-3.docx]

Supplementary 1 BP, P, and SpO2 of all participants under 20% LOP, 40% LOP , 20% LOP* and 40% LOP* with different BFR cuffs,±*s*

| indicators | time  (min) | Non-elastic cuffs | | Elastic cuffs | | *Fg*roup | *P*group | *F*time | *P*time | *F*interact | *P*interact |
| --- | --- | --- | --- | --- | --- | --- | --- | --- | --- | --- | --- |
| 20% LOP | 40% LOP | 20% LOP* | 40% LOP* |
| SBP | 0 | 137.35±14.61 | 132.52±13.88 | 136.16±13.36 | 136.65±13.19 | 0.503 | 0.681 | 99.489 | **<0.001** | 1.315 | 0.214 |
| (mmHg) | 5 | 156.35±17.50 1 | 156.78±20.44 1 | 150.61±17.03 1 | 157.13±16.99 1 |  |  |  |  |  |  |
|  | 10 | 155.23±16.83 1 | 156.19±21.63 1 | 146.16±25.42 1 | 152.68±25.41 1 |  |  |  |  |  |  |
|  | 15 | 154.42±18.50 1 | 156.30±21.21 1 | 151.06±18.95 1 | 152.55±20.91 1 |  |  |  |  |  |  |
|  | 20 | 154.61±21.22 1 | 153.11±22.45 1 | 148.19±21.38 1 | 149.61±17.68 1,2 |  |  |  |  |  |  |
|  | 25 | 132.97±14.27 1-5 | 130.19±14.38 2-5 | 131.74±13.28 1-5 | 128.84±13.19 1-5 |  |  |  |  |  |  |
| DBP | 0 | 73.84±9.31 | 74.22±11.25 | 74.74±9.47 | 74.94±9.41 | 0.533 | 0.660 | 15.940 | **<0.001** | 1.007 | 0.442 |
| (mmHg) | 5 | 79.23±13.10 1 | 81.30±15.33 1 | 80.06±17.47 1 | 79.68±16.18 |  |  |  |  |  |  |
|  | 10 | 79.84±14.21 1 | 83.04±15.88 1 | 79.68±18.78 | 80.87±14.89 1 |  |  |  |  |  |  |
|  | 15 | 77.42±12.00 | 86.22±19.611 1 | 77.52±14.98 | 78.65±15.39 |  |  |  |  |  |  |
|  | 20 | 75.00±12.73 | 80.96±14.61 1,4 | 78.23±19.34 | 75.06±9.98 3 |  |  |  |  |  |  |
|  | 25 | 72.10±10.81 2-4 | 71.85±9.82 2-5 | 72.32±10.02 2-5 | 72.35±8.18 2-4 |  |  |  |  |  |  |
| P | 0 | 71.97±10.26 | 72.56±10.90 | 73.26±8.61 | 73.10±9.21 | 0.154 | 0.927 | 176.421 | **<0.001** | 1.156 | 0.324 |
| (bests/min) | 5 | 88.65±12.68 1 | 87.30±11.15 1 | 85.90±9.61 1 | 87.94±10.71 1 |  |  |  |  |  |  |
|  | 10 | 90.52±12.56 1 | 88.56±12.20 1 | 86.71±10.13 1 | 89.16±11.27 1 |  |  |  |  |  |  |
|  | 15 | 90.61±13.06 1 | 88.00±12.09 1 | 88.71±11.36 1,2 | 86.13±12.75 1,3 |  |  |  |  |  |  |
|  | 20 | 89.06±12.39 1 | 86.22±11.13 1 | 87.58±10.34 1 | 85.97±9.94 1,3 |  |  |  |  |  |  |
|  | 25 | 74.16±10.28 1-5 | 74.52±10.69 2-5 | 74.68±9.20 2-5 | 74.58±9.35 2-5 |  |  |  |  |  |  |
| SpO2 | 0 | 96.81±1.64 | 96.33±1.94 | 97.00±1.46 | 96.61±1.96 | 1.129 | 0.340 | 0.623 | 0.682 | 0.821 | 0.648 |
| (%) | 5 | 96.61±1.71 | 96.22±1.63 | 96.71±2.27 | 96.68±2.73 |  |  |  |  |  |  |
|  | 10 | 96.65±1.80 | 96.07±1.84 | 96.94±1.65 | 96.16±2.31 |  |  |  |  |  |  |
|  | 15 | 96.84±1.57 | 95.93±2.37 | 96.61±2.12 | 97.19±1.66 3 |  |  |  |  |  |  |
|  | 20 | 96.81±2.12 | 96.15±1.61 | 96.16±2.05 | 96.77±1.63 |  |  |  |  |  |  |
|  | 25 | 96.45±1.96 | 96.30±1.64 | 96.32±2.07 | 96.45±1.95 |  |  |  |  |  |  |

LOP: limb occlusion pressure；BP: blood pressure；P: pulse rate；SpO2: pulse oxygen saturation；SBP: systolic blood pressure；DBP: diastolic blood pressure; 1: compared with time 0, *P*<0.05; 2: compared with time 5, *P*<0.05; 3: compared with time 10, *P*<0.05; 4: compared with time 15, *P*<0.05; 5: compared with time 20, *P*<0.05

Supplementary 2 BP, P, and SpO2 of 9 participants under different pressures with non-elastic cuffs,±*s*

| indicators | time  (min) | Non-elastic cuffs | | | *Fg*roup | *P*group | *F*time | *P*time | *F*interact | *P*interact |
| --- | --- | --- | --- | --- | --- | --- | --- | --- | --- | --- |
| 20% LOP | 40% LOP | 60% LOP |
| SBP | 0 | 132.11±14.29 | 131.00±9.11 | 130.33±9.99 | 1.377 | 0.272 | 42.517 | **<0.001** | 1.748 | 0.108 |
| (mmHg) | 5 | 149.00±18.41 1 | 151.67±10.25 1 | 162.00±15.13 1 |  |  |  |  |  |  |
|  | 10 | 149.33±12.19 1 | 149.33±12.54 1 | 162.22±18.53 1 |  |  |  |  |  |  |
|  | 15 | 148.56±19.48 1 | 149.44±13.73 1 | 161.56±19.22 1 |  |  |  |  |  |  |
|  | 20 | 149.44±18.74 1 | 142.00±21.15 | 159.44±17.18 1 |  |  |  |  |  |  |
|  | 25 | 130.33±14.62 2-5 | 126.00±13.56 2-5 | 130.11±13.36 2-5 |  |  |  |  |  |  |
| DBP | 0 | 74.56±11.40 | 75.11±8.85 | 77.67±10.85 | 0.633 | 0.540 | 5.465 | **<0.001** | 1.000 | 0.439 |
| (mmHg) | 5 | 79.56±13.16 | 84.44±13.16 1 | 86.44±12.09 1 |  |  |  |  |  |  |
|  | 10 | 82.00±10.95 | 82.33±13.39 | 90.11±18.44 1 |  |  |  |  |  |  |
|  | 15 | 78.44±11.37 | 87.00±17.87 1 | 81.00±12.41 |  |  |  |  |  |  |
|  | 20 | 76.89±12.04 | 81.67±19.54 | 88.11±7.37 |  |  |  |  |  |  |
|  | 25 | 75.22±12.31 | 75.00±11.20 2,4 | 73.33±8.37 2,3,5 |  |  |  |  |  |  |
| P | 0 | 68.00±7.31 | 72.56±11.13 | 72.78±11.89 | 0.027 | 0.973 | 58.144 | **<0.001** | 0.912 | 0.479 |
| (beats/min) | 5 | 88.67±11.84 1 | 85.78±12.48 1 | 88.33±9.11 1 |  |  |  |  |  |  |
|  | 10 | 89.22±11.50 1 | 88.00±12.43 1 | 87.67±11.50 1 |  |  |  |  |  |  |
|  | 15 | 89.56±12.52 1 | 85.56±13.05 1 | 88.78±10.12 1 |  |  |  |  |  |  |
|  | 20 | 85.89±10.03 1 | 86.00±11.70 1 | 88.00±9.42 1 |  |  |  |  |  |  |
|  | 25 | 70.67±11.18 2,5 | 73.33±11.86 2-5 | 71.67±10.89 2-5 |  |  |  |  |  |  |
| SpO2 | 0 | 97.11±1.45 | 97.22±1.30 | 96.33±1.58 | 0.147 | 0.864 | 1.482 | 0.201 | 1.210 | 0.292 |
| (%) | 5 | 96.11±1.69 | 96.33±1.41 | 96.44±1.74 |  |  |  |  |  |  |
|  | 10 | 96.44±1.59 | 96.56±1.42 | 96.33±1.80 |  |  |  |  |  |  |
|  | 15 | 97.00±1.41 | 95.78±2.86 | 97.00±1.32 |  |  |  |  |  |  |
|  | 20 | 96.67±1.66 | 96.56±1.67 | 98.00±0.87 1,2,3 |  |  |  |  |  |  |
|  | 25 | 96.22±1.86 | 96.33±1.12 | 96.22±1.79 5 |  |  |  |  |  |  |

LOP: limb occlusion pressure；BP: blood pressure；P: pulse rate；SpO2: pulse oxygen saturation；SBP: systolic blood pressure；DBP: diastolic blood pressure; 1: compared with time 0, *P*<0.05; 2: compared with time 5, *P*<0.05; 3: compared with time 10, *P*<0.05; 4: compared with time 15, *P*<0.05; 5: compared with time 20, *P*<0.05

Supplementary 3 BP, P, and SpO2 of 22 participants under different pressures with elastic cuffs,±*s*

| indicators | time  (min) | Elastic cuffs | | | *Fg*roup | *P*group | *F*time | *P*time | *F*interact | *P*interact |
| --- | --- | --- | --- | --- | --- | --- | --- | --- | --- | --- |
| 20% LOP* | 40% LOP* | 60% LOP* |
| SBP | 0 | 135.91±11.11 | 135.14±11.47 | 134.36±15.13 | 0.590 | 0.558 | 49.411 | **<0.001** | 1.480 | 0.178 |
| (mmHg) | 5 | 151.05±14.60 1 | 157.23±15.68 1 | 157.23±16.67 1 |  |  |  |  |  |  |
|  | 10 | 144.05±26.27 | 149.73±27.38 1 | 156.77±18.59 1 |  |  |  |  |  |  |
|  | 15 | 150.55±16.58 1 | 151.50±19.18 1 | 155.86±19.24 1 |  |  |  |  |  |  |
|  | 20 | 147.50±19.34 1 | 147.95±16.96 1,2 | 154.55±22.79 1 |  |  |  |  |  |  |
|  | 25 | 130.32±10.72 1-5 | 125.55±11.55 1-5 | 126.05±15.14 1-5 |  |  |  |  |  |  |
| DBP | 0 | 74.36±8.66 | 74.50±9.66 | 72.82±11.12 | 0.051 | 0.950 | 8.436 | **<0.001** | 0.566 | 0.794 |
| (mmHg) | 5 | 81.55±14.90 1 | 78.77±13.73 | 81.73±20.33 1 |  |  |  |  |  |  |
|  | 10 | 80.73±18.20 | 82.05±17.30 1 | 80.05±14.93 1 |  |  |  |  |  |  |
|  | 15 | 76.59±11.50 | 79.59±17.19 | 77.36±13.65 |  |  |  |  |  |  |
|  | 20 | 79.18±17.32 | 74.27±10.18 3 | 76.50±12.76 |  |  |  |  |  |  |
|  | 25 | 72.91±8.54 2,3,5 | 72.55±8.42 3,4 | 70.91±11.01 2-5 |  |  |  |  |  |  |
| P | 0 | 74.41±8.58 | 73.73±8.57 | 76.09±8.64 | 0.033 | 0.968 | 75.088 | **<0.001** | 0.927 | 0.472 |
| (beats/min) | 5 | 87.68±9.44 1 | 90.82±10.41 1 | 89.68±12.79 1 |  |  |  |  |  |  |
|  | 10 | 88.91±10.04 1 | 90.45±11.00 1 | 90.27±12.27 1 |  |  |  |  |  |  |
|  | 15 | 91.05±11.83 1 | 87.55±14.52 1 | 89.86±10.62 1 |  |  |  |  |  |  |
|  | 20 | 90.18±9.42 1 | 87.41±9.43 1 | 88.14±11.85 1 |  |  |  |  |  |  |
|  | 25 | 76.73±8.90 2-5 | 76.05±8.62 2-5 | 75.68±9.69 2-5 |  |  |  |  |  |  |
| SpO2 | 0 | 97.00±1.38 | 96.36±1.99 | 95.86±1.61 | 1.908 | 0.157 | 0.250 | 0.940 | 0.812 | 0.617 |
| (%) | 5 | 96.59±2.52 | 96.64±3.02 | 95.91±2.00 |  |  |  |  |  |  |
|  | 10 | 96.91±1.63 | 96.09±2.47 | 95.95±1.79 |  |  |  |  |  |  |
|  | 15 | 96.73±1.78 | 97.00±1.72 | 96.00±2.12 |  |  |  |  |  |  |
|  | 20 | 96.05±2.13 | 96.68±1.70 | 96.27±1.78 |  |  |  |  |  |  |
|  | 25 | 96.64±1.81 | 96.5±1.85 | 95.73±2.00 |  |  |  |  |  |  |

LOP: limb occlusion pressure；BP: blood pressure；P: pulse rate；SpO2: pulse oxygen saturation；SBP: systolic blood pressure；DBP: diastolic blood pressure; 1: compared with time 0, *P*<0.05; 2: compared with time 5, *P*<0.05; 3: compared with time 10, *P*<0.05; 4: compared with time 15, *P*<0.05; 5: compared with time 20, *P*<0.05
